# Supplementary material
Source: ML conference proceedings conference paper supplement (https://aclanthology.org/2020.nlpbt-1.8)
Supplement: OptionalSupplementaryMaterial [file 2020.nlpbt-1.8.OptionalSupplementaryMaterial.pdf]

# 1 Appendix

Doch ohne zivilgesellschaftliche Organisationen könne eine Demokratie

But without civil society organisations, democracy cannot work.

Wie funktioniert das Kontrollsystem in Deutschland?

How does the control system work in Germany?

Es gibt mehr als genug.

There are more than enough.

Vorbeugen der Krankheit

Prevention of the disease

Es ist auch ein Risikofaktor für mehrere andere Krebsarten.

It is also a risk factor for several other cancers.

Das wird nicht passieren.

That will not happen.

Das ist eine schwierige Frage.

That is a difficult question.

Figure 1: Example *correct* predictions made by the full model on De→En image translation task.

Professor Eastwood stimmt dem zu.

Professor Eastwood agrees to this.

Er wurde 81 Jahre alt.

He was 81 years old.

Wer war der beste Spieler von Puerto Rico?

Who was the best player of Puerto Rico?

Das war immer schon ein empfindliches Thema.

That has always been a sensitive issue.

Spenden für die neue Seele

Donations for the New Soul

Meine mexikanisch-amerikanische Identitätskrise.

My Mexican-American identity crisis.

"Der Koran ist unsere Verfassung"

"The Koran is our Constitution"

Figure 2: Example predictions with *minor typo* made by the full model on De→En image translation task.
